# Supplementary material for: A role for the Myoblast city homologues Dock1 and Dock5 and the adaptor proteins Crk and Crk-like in zebrafish myoblast fusion
Source: Oxford University Press journal article supplement (doi:10.1242/dev.001214), 2007-08-02
Supplement: dev001214-figs1.pdf [file dev001214-figs1.pdf]

Zf\_Dock1  
ENSP00000280333\_Hs\_Dock1  
Zf\_Dock5  
ENSP00000276440\_Hs\_Dock5  
MSRWVPTKKE-KYGVAVYNYDARSNEELSLQIGDTHILETYEGWYRGYR  
MTRWVPTKREEKYGVAFYNYDARGADELSLQIGDTHILETYEGWYRGYT  
MTRWIPTKRE-KYGVAIYNYDAKGEPELSLQVGDTHILETFEGWYRGYT  
MARWIPTKRQ-KYGVAIYNYNASQDVLESLQIGDTHILEMYEGWYRGYT  
\*::\*:\*\*\*: : \*\*\*\*\*.\*\*\*:\* \*\*\*\*\*:\*\*\*\*\* :\*\*\*\*\*

Zf\_Dock1  
ENSP00000280333\_Hs\_Dock1  
Zf\_Dock5  
ENSP00000276440\_Hs\_Dock5  
LRRKSKKGVFPACYIHLKEATVEGSGQKETVPI TELPLVHEVTTTLREWA  
LRKSKKKGIFPASYIHLKEAIVEGKGQHETVPIPGDLPLIQEVTTTLREWS  
LRQKSQKGFIPASYIHLKEAKVEGTGKQETVVPTELPLVQELGTTLREW  
LQNKSKKGFIPETYIHLKEATVEDLGQHETVPIGELPLVQELTSTLREWA  
\*:.\*\*:\*:\*:\* \*\*\*\*\* \*\* . \*::\*\*:\* \* :\*\*\*:\*. : \*\*\*\*\*:

Zf\_Dock1  
ENSP00000280333\_Hs\_Dock1  
Zf\_Dock5  
ENSP00000276440\_Hs\_Dock5  
AIWRDLVVGDKREMFNTVRDMIYDLIEWRSQILSGTLPQDELTELKQRV  
TIWRQLYVQDNREMFNRVHMIYDLIEWRSQILSGTLPQDELKELKKKVT  
QIWHKLYVNNKSTLFRNVQOMAYSLIEYRSQIVSGTLPNDLVELKKKVT  
VIWRKLYVNNKLTFRQLQOMTYSLIEWRSQILSGTLPKDELAELKKKVT  
\*\*:.\*\*\* : : \*. :. :.\* \*.\*\*\*:\*\*\*:\*\*\*:\*\*\*:\*. \* \*\*::\*\*

Zf\_Dock1  
ENSP00000280333\_Hs\_Dock1  
Zf\_Dock5  
ENSP00000276440\_Hs\_Dock5  
SKMDYGNKYLDLVLVRRDKGNILDPDLTSTVNLFRAHETASKQIEARIQ  
AKIDYGNRILDLVLVRRDEGNILDPDLTSTISLFRAEHIAKQVEERLQ  
AKIDYGNRILGLDLVRRDEAGNTLDPESSTVSLFRAHESASHSIDERIQ  
AKIDHGNRMLGLDLVRRDDNGNILDPDETSTIALFKAHEVASKRIEIKIQ  
:\*\*\*:\*\*\*: \*.\*\*\*\*\*. \*\* \*\*\*: :\*\* :\*\*:\* \*\* : : : \*\*

Zf\_Dock1  
ENSP00000280333\_Hs\_Dock1  
Zf\_Dock5  
ENSP00000276440\_Hs\_Dock5  
EEKSQKQNLDLNRLAKFASTPSFALFVTLKNVCKIGEDAELMSLYDPI  
EEKSQKQNLIDINRQAKFAATPSLALFVNLKNVCKIGEDAELMSLYDPV  
EEKMRLQNLKRRQSLFSGVHTYSLLMNLRNFVCNIGEDAELMSLYDPD  
EEKSILQNLDLRGQSFSTIHTYGLYVNFKNFVCNIGEDAELMALYDPD  
\*\*\* \*\*:: . : \* : : . \* :. :.\*.\*\*\*:\*\*\*:\*\*\*:\*\*\*:\*\*\*

Zf\_Dock1  
ENSP00000280333\_Hs\_Dock1  
Zf\_Dock5  
ENSP00000276440\_Hs\_Dock5  
ESKFISENYLVRWSSSGLVKDIDQLHNLRAVFTDLGSEDLKREKISFVCQ  
ESKFISENYLVRWSSSGLPKDIDRLHNLRAVFTDLGSKDLKREKISFVCQ  
KSEFISENYLVRWSDSTGMPKEIEKLNLPALFTDLNSSDLLRQRLFVLCQ  
QSTFISENYLIRWGSNGMPKEIEKLNLPALFTDLSSMDLIRPRVSLVCQ  
:\* \*\*\*\*\*:\*\*\*.\*.\*: \*::\*\*:\* \*\* \*:\* \*\* \* : : : \*\*

Zf\_Dock1  
ENSP00000280333\_Hs\_Dock1  
Zf\_Dock5  
ENSP00000276440\_Hs\_Dock5  
IVRVGRMELRDNNTKKLTSGLRRPFGVAVMDVTDIITGKMDEDKQHFIP  
IVRVGRMELRDNNTKKLTSGLRRPFGVAVMDVTDIINGKVDDEDKQHFIP  
IIRVGCMEKKEG--KKHTGGLRRPFGVAVMDITDIAHGKTDDEKQYFIP  
IVRVGHMELKEG--KKHTCGLRRPFGVAVMDITDIHKGVDDEKQHFIP  
\*::\*\* \*\*::: . : \* \* \*\*\*\*\*:\*\*\* \*\* \*::\*\*:\* \*\*

Zf\_Dock1  
ENSP00000280333\_Hs\_Dock1  
Zf\_Dock5  
ENSP00000276440\_Hs\_Dock5  
FQPVA-----GESDFLQSVINKVIAAKEVNHKGQ  
FQPVA-----GENDFLQTVINKVIAAKEVNHKGQ  
FQOIAMETYIRQRQLIMSPLIPSRVIGENEPLVAVFNKVIATREVNHHKGQ  
FQOIAMETYIRQRQLIMSPLITSHVIGENEPLTSLVNLKVIAAKEVNHKGQ  
\*\* :\* \*\* . : \* :\*:\* \*\*::\*\*\*\*\*

Zf\_Dock1  
ENSP00000280333\_Hs\_Dock1  
Zf\_Dock5  
ENSP00000276440\_Hs\_Dock5  
GLWVTLKLLPGDIHQIRKDFPHLVDRSTAVARKMGFPEIIMP GDVRNDIY  
GLWVTLKLLPGDIHQIRKEFPHLVDRSTAVARKMGFPEIIMP GDVRNDIY  
GLFVTLKLLPGDV FQVQKDYPHFVDRSTAIVRKMGFPEIILPGYVRNDIY  
GLWVSLKLLPGDLTQVQKNFVSHLVDRSTAIARKMGFPEIILPGDVRNDIY  
\*::\*\*:\* \*\*::: . : \* \* \*\*\*\*\*:\*\*\* \*\* \*::\*\*:\* \*\*

Zf\_Dock1  
ENSP00000280333\_Hs\_Dock1  
Zf\_Dock5  
ENSP00000276440\_Hs\_Dock5  
VTLVQGFDFDKGSKTTPKNVEVTMSVHDEDGKLESVIFPGAGDEGILEYK  
VTLVQGFDFDKGSKTTAKNVEVTVSVYDEDGKRLEHVIFPGAGDEAISEYK  
VTLVQGFDFDRGKKKTPKNVEVIVSVLDEEGNPMKAIIFPGAGYEGITEYK  
VTLIHGEFDFDKGKKKTPKNVEVTMSVHDEEGKLEKAIHPGAGYEGISEYK  
\*::\*\*:\* \*\*::: . : \* \* \*\*\*\*\*:\*\*\* \*\* \*::\*\*:\* \*\*

Zf\_Dock1  
ENSP00000280333\_Hs\_Dock1  
Zf\_Dock5  
SVIYYQVKQPRWYETIKVAIPIEDVNRSHLRFTRHRRSSQDCKDKSEKNF  
SVIYYQVKQPRWFETVKVAIPIEDVNRSHLRFTRHRRSSQDCKDKSEKIF  
SVIYYQVKQPCWNETVKVAIPIEDVCRCHLRLTRHRRSSQDSRDKSEKPF

ENSP00000276440\_Hs\_Dock5 SVVYYQVKQPCWYETVKVSI AIEEVTRCHIRFTFRHRSSQETRDKSERAF  
\*:\*\*\*\*\* \* \*\*:\*:\*.\*\*\*:\* \*.\*:\*:\*:\*:\*:\*:\*:\* :\*\*\*\*\*: \*

Zf\_Dock1 ALSFVKLMRYDGTTLRDGEHDLIVYKAEAKKLEDSSMYLSLASTKPEMEE  
ENSP00000280333\_Hs\_Dock1 ALAFVKLMRYDGTTLRDGEHDLIVYKAEAKKLEDAATYLSLPSTKAELEE  
Zf\_Dock5 GMAFVRLMKSDGTTLPDGKHELIIVYKVDGKKADDAKTYLSLPGTYTEVEE  
ENSP00000276440\_Hs\_Dock5 GVAFVKLMNPDGTTLQDGRHDLVYKGDNKKMEDAKFYLTLPGTKMEMEE  
.:\*\*:\*:\* .\*\*\*\*\* \*\*.\*:\*:\*:\* : \*\* :\*: \*\*:\*..\* \*:\*

Zf\_Dock1 R-NPSSGKNAQNLG-SFTISKDSFQISTLVCSTKLTQNVDLLGLLKWRSN  
ENSP00000280333\_Hs\_Dock1 KGHSATGKSMQSLG-SCTISKDSFQISTLVCSTKLTQNVDLLGLLKWRSN  
Zf\_Dock5 K-ERQTGKSFHHGG-AVPVTKDSFQIATLTCSTKLTQNVDLLGLLNWRSN  
ENSP00000276440\_Hs\_Dock5 K-ELQASKNLVTFTPSKDSTKDSFQIATLICSTKLTQNVDLLGLLNWRSN  
: . :.\*. : :\*\*\*\*\*:\* \*\*\*\*\*:\*\*\*\*

Zf\_Dock1 TSSLQONLRHLMKVEGGEVVKFLQDTLDALFNIMMENS DSETFDLVFD  
ENSP00000280333\_Hs\_Dock1 TSSLQONLRQLMKVDGGEVVKFLQDTLDALFNIMMENSESETFDLVFD  
Zf\_Dock5 TERLEEILQKLMEVEGGEIKFLQDTLDALFNIMMETSSEETFDLVFNA  
ENSP00000276440\_Hs\_Dock5 SQNIKHNLLKLMVEVDGGEIVKFLQDTLDALFNIMMENS DSETYDFLVFDA  
:. :.. \*:\*:\*:\*:\*:\*:\*:\*:\*:\*:\*:\*:\*:\*:\* \*:.\*\*:\* \*\*:\*

Zf\_Dock1 LVFIIIGLIADRKFHFNVPLETYIRKHFSA TLAYTKLTKVLKNYVDNAEK  
ENSP00000280333\_Hs\_Dock1 LVFIIIGLIADRKFQHFNPVLETYIKKHFSA TLAYTKLTKVLKNYVDGAEK  
Zf\_Dock5 LVFIIISLIGDIKFQHFNPVLETYINKHFSA TLAYQKLTKVLNXYVGHAE  
ENSP00000276440\_Hs\_Dock5 LVFIIISLIGDIKFQHFNPVLETYIKKHFSA TLAYVKLSKVLNXYVANADD  
\*\*\*\*\*.\*.\* \*\*:\*\*\*\*\*\* \*\*\*\*\* \*\*:\*:\*: :\* \*:.:

Zf\_Dock1 --LSEQLLKALKAI EYIFKFI VRSRVLFNQLYENKGE SDFMESLRNLFA  
ENSP00000280333\_Hs\_Dock1 PGVNEQLYKAMKALESIFKFI VRSRILFNQLYENKGEAD-FVESLLQLFR  
Zf\_Dock5 STHTERLYAALKAFKYLFRFIVQSRVLYLRFY GKS EDGGQFQDSIRTLFL  
ENSP00000276440\_Hs\_Dock5 SSKTELLFAALKALKYLFRFIIQSRVLYLRFY GSKDGEFNNSIRQLFL  
. \* \* \*:\*:\*: ::\*:\*:\*:\*:\*: ::\* :. :.. \* :\*: \*\*

Zf\_Dock1 SFNAMNNSGAEGTGGVKG AALKYVPTIVNDLKL VFDPKELS KLFSEFILK  
ENSP00000280333\_Hs\_Dock1 SINDMMSMSDQTVRVKGAALKYLPTIVNDVKL VFDPKELSKMFTEFILN  
Zf\_Dock5 SISILMDRPLDEGVKIKGAILKYLPTIINDLQKVFDAVELSVQLSKFIES  
ENSP00000276440\_Hs\_Dock5 AFNMLMDRPLEEAVKIKG AALKYLP SIINDVKL VFDPVLSVLFCKFIQS  
:.. :.\*. : :\*\*\* \*\*:\*:\*:\*:\*: \*\* . \*\* : :\*\* .

Zf\_Dock1 VPLGRLVKQKLH CMIDIVHSDLFTQHDCREILLPLMTDQKLHLE---NH  
ENSP00000280333\_Hs\_Dock1 VPMGLLTIQKLYCLIEIVHSDLFTQHDCREILLPMMTDQKYHLE---RQ  
Zf\_Dock5 IPDFQMVVRQKLGCLVKIVESNLFKQ PDCRDVLLPLITDQLSGQLDDNSNK  
ENSP00000276440\_Hs\_Dock5 IPDNQLVRQKLN CMTKIVESTLFRQSECREVLLPLITDQLSGQLDDNSNK  
:\* :. \*\*\* \* : .\*\*\* \* \* \* :\*:\*:\*:\*:\*:\* . :\* :. :

Zf\_Dock1 EELESCQLLSDILEVL YRKDVGP TQWHVQI IMEKL LRTINRTVISMGRD  
ENSP00000280333\_Hs\_Dock1 EDLEACCQLLSHILEVL YRKDVGP TQRHVQI IMEKL LRTVNRVVISMGRD  
Zf\_Dock5 PDLEACVQLLSTVLDMLDCKNVGP TSGHVKLI VDRLLRRVNRVVISMGRD  
ENSP00000276440\_Hs\_Dock5 PDHEASSQLLSDILEVLDRKDVGATAVHIQLIMERLLRRINRTVIGMNRQ  
: \*:. \*\*\*\* :\*:\* \*:\*:\* \* :\*:\*:\*:\*:\* :\*\*\*\*\*. :. :

Zf\_Dock1 SSLIGSFVACMTGTLRQMDYHYTHL ISTFGKMR TDVVDFLME TFI MFKD  
ENSP00000280333\_Hs\_Dock1 SELIGNFVACMTAILRQMEDYHYAHLIKTFGKMR TDVVDFLME TFI MFKN  
Zf\_Dock5 SPYIGHYLACMTAILKQMEDAHYAQYINTF-KTRQDVIDFLME TFI MFKN  
ENSP00000276440\_Hs\_Dock5 SPHIGSFVACMIALLQMDDSHYSHYISTF-KTRQDVIDFLME TFI MFKD  
\* \*\* :\*:\* . \*:\*:\* \* \* :\* : \* \* \* \* :\*:\*:\*:\*:\*:\* :

Zf\_Dock1 LIGKNVYPGDWVIMNM MNQKVFLRAINQYAAVLSK KFLDQTNFELQLWNN  
ENSP00000280333\_Hs\_Dock1 LIGKNVYPFDWVIMNMVQNKVFLRAINQYADMLNKKFLDQANFELQLWNN  
Zf\_Dock5 LMG-NVFPDWMIMNLLQMKVFLRAIDQYSEVLNKGFLDYASFHLQLWNN  
ENSP00000276440\_Hs\_Dock5 LIGKNVYAKDWMVMMNTQNRVFLRAINQFAEVLTRFFMDQASFELQLWNN  
\*:\* \*\*:. \*\*:\*:\*: \* :\*\*\*\*\*:\*:\* :\*:. \*:\* :.\*.\*\*\*\*\*



ENSP00000276440\_Hs\_Dock5 PLSMLLSGIVDPVAVMGGFSNYEKAFFTEKYLQEHPEDEQEKVELLKRLIAL  
\*\*\*\*:\*.\*\*\*\*\*:\*\*\*\*\*: \* : :\*: \* : \* \* \*

Zf\_Dock1 QIPNLAEGVRIHGEKVTEALRPFHERLEACFRQLKEKVEKQYGIPTLPPM  
ENSP00000280333\_Hs\_Dock1 QIPFLAEGIRIHGDKVTEALRPFHERMEACFKQLKEKVEKEYGVRIMPSS  
Zf\_Dock5 QIPLLDGEGIRIHGEKSTEQKPLHNRIIVTCFQDLRAKVEKLYGVITLPCS  
ENSP00000276440\_Hs\_Dock5 QMPLLTEGIRIHGEKLTQKPLHERLSSCFRELKEKVEKHYGVITLPPN  
\*: \* \* \*:\*\*\*\*:\* \* \* :\*:\*: \* : \* \* \* \* \* : \* \*

Zf\_Dock1 TDERRGSRPRSMVRSFTMPSSQRPLSVASVTS-----LSSDNPSRPG  
ENSP00000280333\_Hs\_Dock1 LDDRRGSRPRSMVRSFTMPSSSRPLSVASVSS-----LSSDSTPSRPG  
Zf\_Dock5 LTEKKKSRVGSVVMPIYMSSTLRMSTISNASSGHSSGSGSSDGNSSRPA  
ENSP00000276440\_Hs\_Dock5 LTERKQSRGTGIVLPYIMSSTLRRLSITSVTSSVSTSSNSSDNAPSRPG  
: : \* \* \* : \* \* . : \* \* : \* : \* \* \* \* \* \* \* \* \* \* \* \* . \* \* .

Zf\_Dock1 SDGFALEPLLP--KKQHFKSQDKLDRDE--PEKDRKEKKKEKRN~~SKHQEL~~  
ENSP00000280333\_Hs\_Dock1 SDGFALEPLLP--KKMHSRSQDKLDKDD--LEKEKDKKKKEKRN~~SKHQEI~~  
Zf\_Dock5 SQDSL~~LS~~-----RVSDNRVSVLSRSEE--DNRISKKNRKEWSVSKSQVL  
ENSP00000276440\_Hs\_Dock5 SDGSILEPLLERASSGARVEDLSLREENSENRIKFKRKDWLSKSKQVI  
\* : . \* . : . : : \* : \* : \* \* \* :

Zf\_Dock1 FDKELKTADIPLOANEAVILSETISPLRPQRPKSQVINLLG-EKRLSVSP  
ENSP00000280333\_Hs\_Dock1 FEKEFKPTDISLQOSEAVILSETISPLRPQRPKSQVMNIGSERRFSVSP  
Zf\_Dock5 LERPADTDEIPPE-----KQPRPKSLTIGDRRLTSLFHFGE  
ENSP00000276440\_Hs\_Dock5 AEKAPEDLMSPTR-----KAQRPKSLQLMDNRLSP--FHGS  
: : . . : . : : \* \* \* \* :

Zf\_Dock1 GAPANQFVPSVPPPI~~T~~PRAKLQF~~S~~LLSGSNLELNG-TSYADKGET~~P~~PLLP  
ENSP00000280333\_Hs\_Dock1 SSPSSQQT~~P~~---PPVT~~P~~RAKL~~S~~FSMQS--SLELNG-MTGADVADV~~P~~PLLP  
Zf\_Dock5 SSNLSLHNPLSPLPAS~~P~~HTPRSSSYTC---LPSESNFSTPDFTNI~~P~~PPMP  
ENSP00000276440\_Hs\_Dock5 SP--PQSTPLSPP~~P~~LTPKATR~~T~~LS~~S~~PS---LQTDGIAATP----VPPPPP  
. . \* \* : \* : \* . \* : . : \* \* \*

Zf\_Dock1 VKSSMGDYGNLMDNSDLASPTTPPPPPPHQRHL~~P~~PLPSK~~T~~PPPPPK~~T~~T  
ENSP00000280333\_Hs\_Dock1 LKGSVADYGNLMENQDLLGSPTPPPPPPHQRHL~~P~~PLPSK~~T~~PPPPPK~~T~~T  
Zf\_Dock5 AKRRPHETDSIYNSTYDFMPP-----LPAKVENK-PPPPPK~~T~~R  
ENSP00000276440\_Hs\_Dock5 PKSKPYE-GSQNST-ELAPP-----LPVREAKAPPPPPK~~A~~R  
\* : . . : . . \* \* \* \* \* \* \* \* :

Zf\_Dock1 RKQTSIDSGIVQ  
ENSP00000280333\_Hs\_Dock1 RKQASVDSGIVQ  
Zf\_Dock5 KSMFPTYESNQQ  
ENSP00000276440\_Hs\_Dock5 KSGIPTSEPGSQ  
: . . . \*
