# Supplementary material for: A role for the Myoblast city homologues Dock1 and Dock5 and the adaptor proteins Crk and Crk-like in zebrafish myoblast fusion
Source: Oxford University Press journal article supplement (doi:10.1242/dev.001214), 2007-08-02
Supplement: dev001214tables1-6.pdf [file dev001214tables1-6.pdf]

**Table S1. Data for wild-type embryos at progressive stages**

| Number of nuclei       | 15 somites | 20 somites<br>(19 hpf) | 22 somites<br>(20 hpf) | 24 hpf | 26-28 hpf | 30 hpf | 34 hpf | 48 hpf |
|------------------------|------------|------------------------|------------------------|--------|-----------|--------|--------|--------|
| 1                      | 113        | 240                    | 119                    | 71     | 432       | 108    | 55     | 3      |
| 2                      | 0          | 26                     | 53                     | 150    | 733       | 197    | 170    | 22     |
| 3                      | 0          | 3                      | 38                     | 111    | 824       | 234    | 129    | 61     |
| 4                      | 0          | 0                      | 14                     | 37     | 390       | 116    | 72     | 33     |
| 5                      | 0          | 0                      | 1                      | 13     | 119       | 40     | 16     | 9      |
| 6                      | 0          | 0                      | 0                      | 2      | 26        | 12     | 1      | 2      |
| 7                      | 0          | 0                      | 0                      | 0      | 7         | 2      | 0      | 0      |
| Total number of fibres | 113        | 269                    | 225                    | 384    | 2531      | 709    | 443    | 130    |
| Total number of nuclei | 113        | 301                    | 400                    | 929    | 6730      | 1954   | 1156   | 419    |
| Mean nuclei/fibre      | 1          | 1.12                   | 1.78                   | 2.42   | 2.66      | 2.76   | 2.61   | 3.22   |

**Table S2. Data for morphant embryos at 26-28 hpf**

|                        | Dock1 ATG |         |           | Dock1 splice |           | Dock5 splice 1 |           |           | Dock5 splice 2 |         |         | D1spl & D5spl1    |                 |
|------------------------|-----------|---------|-----------|--------------|-----------|----------------|-----------|-----------|----------------|---------|---------|-------------------|-----------------|
|                        | 0.5<br>mM | 1<br>mM | 1.5<br>mM | 0.3<br>mM    | 0.5<br>mM | 0.3<br>mM      | 0.4<br>mM | 0.5<br>mM | 0.5<br>mM      | 1<br>mM | 2<br>mM | 0.225 &<br>0.3 mM | 0.3 & 0.4<br>mM |
| Number of nuclei       |           |         |           |              |           |                |           |           |                |         |         |                   |                 |
| 1                      | 66        | 134     | 116       | 279          | 209       | 176            | 185       | 520       | 159            | 192     | 38      | 198               | 172             |
| 2                      | 111       | 150     | 220       | 226          | 64        | 91             | 41        | 111       | 122            | 109     | 21      | 116               | 35              |
| 3                      | 74        | 76      | 191       | 113          | 11        | 28             | 9         | 28        | 56             | 61      | 16      | 59                | 8               |
| 4                      | 33        | 8       | 44        | 22           | 0         | 6              | 2         | 5         | 15             | 26      | 2       | 8                 | 2               |
| 5                      | 6         | 0       | 6         | 2            | 0         | 6              | 0         | 2         | 6              | 5       | 0       | 2                 | 0               |
| 6                      | 1         | 0       | 2         | 0            | 0         | 0              | 0         | 1         | 1              | 0       | 0       | 0                 | 0               |
| 7                      | 2         | 0       | 0         | 0            | 0         | 0              | 0         | 0         | 0              | 0       | 0       | 0                 | 0               |
| Total number of fibres | 293       | 368     | 579       | 642          | 284       | 307            | 237       | 667       | 359            | 393     | 77      | 383               | 217             |
| Total number of nuclei | 692       | 694     | 1347      | 1168         | 370       | 496            | 302       | 862       | 667            | 722     | 136     | 649               | 274             |
| Mean nuclei/fibre      | 2.36      | 1.89    | 2.33      | 1.82         | 1.30      | 1.62           | 1.27      | 1.29      | 1.86           | 1.84    | 1.77    | 1.69              | 1.26            |

|                        | Crk<br>ATG | Crk splice |         | Crk-like ATG |           |           | Crk-like splice |         | D5spl1 & CrkIATG   |                 | Crk spl &<br>CrkIATG |
|------------------------|------------|------------|---------|--------------|-----------|-----------|-----------------|---------|--------------------|-----------------|----------------------|
|                        | 0.1<br>mM  | 0.5<br>mM  | 1<br>mM | 0.3<br>mM    | 0.4<br>mM | 0.5<br>mM | 0.5<br>mM       | 2<br>mM | 0.3 &<br>0.3<br>mM | 0.4 & 0.4<br>mM | 0.5 & 0.4<br>mM      |
| Number of nuclei       |            |            |         |              |           |           |                 |         |                    |                 |                      |
| 1                      | 214        | 127        | 336     | 215          | 262       | 439       | 97              | 367     | 296                | 253             | 245                  |
| 2                      | 92         | 97         | 227     | 128          | 187       | 173       | 98              | 270     | 36                 | 31              | 91                   |
| 3                      | 33         | 38         | 58      | 51           | 71        | 67        | 107             | 106     | 27                 | 6               | 30                   |
| 4                      | 3          | 4          | 6       | 9            | 16        | 6         | 47              | 21      | 7                  | 1               | 2                    |
| 5                      | 0          | 0          | 1       | 1            | 5         | 3         | 17              | 9       | 0                  | 0               | 2                    |
| 6                      | 0          | 0          | 0       | 0            | 1         | 0         | 2               | 0       | 0                  | 0               | 0                    |
| 7                      | 0          | 0          | 0       | 0            | 0         | 0         | 1               | 0       | 0                  | 0               | 0                    |
| Total number of fibres | 342        | 266        | 628     | 404          | 542       | 688       | 369             | 773     | 366                | 291             | 370                  |
| Total number of nuclei | 509        | 451        | 993     | 665          | 944       | 1025      | 906             | 1354    | 477                | 337             | 535                  |
| Mean nuclei/fibre      | 1.49       | 1.70       | 1.58    | 1.65         | 1.74      | 1.49      | 2.46            | 1.75    | 1.30               | 1.16            | 1.45                 |

Distribution of fibres according to number of nuclei. Mean nuclei/fibre calculated from total numbers of fibres and nuclei, i.e.  $n$ =number of fibres.

**Table S3. Data for embryos injected with *crk* and *crkl* mRNA, at 26-28 hpf**

| Number of nuclei       | Control | <i>crk</i> mRNA<br>0.3 $\mu\text{g}/\mu\text{l}$ | Crk splice MO<br>1 mM | <i>crk</i> mRNA<br>0.3 $\mu\text{g}/\mu\text{l}$ &<br>Crk spl MO<br>1 mM | <i>crkl</i> mRNA<br>0.1 $\mu\text{g}/\mu\text{l}$ | Crkl splice MO<br>1.5 mM | <i>crkl</i> mRNA<br>0.3 $\mu\text{g}/\mu\text{l}$ &<br>Crkl spl MO<br>1.5 mM |
|------------------------|---------|--------------------------------------------------|-----------------------|--------------------------------------------------------------------------|---------------------------------------------------|--------------------------|------------------------------------------------------------------------------|
| 1                      | 258     | 158                                              | 280                   | 172                                                                      | 84                                                | 307                      | 84                                                                           |
| 2                      | 403     | 169                                              | 243                   | 157                                                                      | 64                                                | 173                      | 99                                                                           |
| 3                      | 453     | 278                                              | 82                    | 126                                                                      | 151                                               | 76                       | 122                                                                          |
| 4                      | 191     | 175                                              | 24                    | 51                                                                       | 120                                               | 20                       | 87                                                                           |
| 5                      | 52      | 90                                               | 3                     | 19                                                                       | 78                                                | 5                        | 35                                                                           |
| 6                      | 17      | 28                                               | 1                     | 7                                                                        | 26                                                | 1                        | 27                                                                           |
| 7                      | 3       | 12                                               | 0                     | 0                                                                        | 16                                                | 1                        | 5                                                                            |
| 8                      | 0       | 7                                                | 0                     | 0                                                                        | 9                                                 | 0                        | 5                                                                            |
| Total number of fibres | 1377    | 910                                              | 633                   | 532                                                                      | 539                                               | 583                      | 459                                                                          |
| Total number of nuclei | 3570    | 2788                                             | 1129                  | 1205                                                                     | 1875                                              | 999                      | 1408                                                                         |
| Mean nuclei/fibre      | 2.59    | 3.06                                             | 1.78                  | 2.27                                                                     | 3.48                                              | 1.71                     | 3.07                                                                         |

Control group injected with *mylz2:GFP* alone. Distribution of fibres according to number of nuclei. Mean nuclei/fibre calculated from total numbers of fibres and nuclei, i.e.  $n$ =number of fibres.

**Table S4. Data for wild-type embryos at progressive stages**

|             | 15 somites | 20 somites<br>(19 hpf) | 22 somites<br>(20 hpf) | 24 hpf | 26-28 hpf | 26-28 hpf | 26-28 hpf | 30 hpf | 34 hpf | 48 hpf |
|-------------|------------|------------------------|------------------------|--------|-----------|-----------|-----------|--------|--------|--------|
|             | 1.00       | 1.00                   | 2.32                   | 2.70   | 2.46      | 3.26      | 1.93      | 3.18   | 2.34   | 3.17   |
|             | 1.00       | 1.09                   | 1.50                   | 2.36   | 2.89      | 3.18      | 2.36      | 3.43   | 2.90   | 2.67   |
|             | 1.00       | 1.09                   | 1.42                   | 2.00   | 2.29      | 3.06      | 2.71      | 2.67   | 2.12   | 2.88   |
|             | 1.00       | 1.06                   | 1.19                   | 1.90   | 2.29      | 2.67      | 3.22      | 2.91   | 2.09   | 3.83   |
|             | 1.00       | 1.00                   | 1.36                   | 2.11   | 2.50      | 2.18      | 3.04      | 3.14   | 2.75   | 3.83   |
|             | 1.00       | 1.00                   | 1.79                   | 3.32   | 2.05      | 2.88      | 3.06      | 2.63   | 2.80   | 3.14   |
|             |            | 1.00                   | 2.54                   | 3.00   | 2.51      | 2.76      | 2.39      | 2.43   | 2.97   | 3.25   |
|             |            | 1.57                   |                        | 2.00   | 2.76      | 2.26      | 3.12      | 3.36   | 2.76   | 3.13   |
|             |            | 1.25                   |                        | 2.53   | 3.22      | 2.25      | 2.70      | 3.47   | 3.21   |        |
|             |            | 1.43                   |                        | 2.19   | 2.07      | 2.52      | 2.72      | 2.90   | 3.36   |        |
|             |            | 1.12                   |                        | 3.20   | 2.71      | 2.38      | 2.78      | 3.13   | 2.33   |        |
|             |            | 1.09                   |                        | 2.46   | 2.55      | 2.29      | 2.70      | 2.58   | 2.83   |        |
|             |            | 1.67                   |                        |        | 3.25      | 2.26      | 2.38      | 3.14   |        |        |
|             |            | 1.26                   |                        |        | 3.00      | 2.05      | 2.54      | 2.97   |        |        |
|             |            |                        |                        |        | 2.22      | 2.25      | 3.19      | 2.45   |        |        |
|             |            |                        |                        |        | 2.63      | 1.76      | 2.50      | 2.59   |        |        |
|             |            |                        |                        |        | 3.16      | 1.44      | 2.56      | 2.64   |        |        |
|             |            |                        |                        |        | 2.53      | 1.53      | 2.87      | 2.62   |        |        |
|             |            |                        |                        |        | 2.54      | 3.18      | 2.24      | 2.78   |        |        |
|             |            |                        |                        |        | 2.63      | 2.55      | 2.63      | 2.28   |        |        |
|             |            |                        |                        |        | 2.92      | 2.93      | 2.96      | 2.47   |        |        |
|             |            |                        |                        |        | 2.61      | 3.42      | 2.95      | 2.08   |        |        |
|             |            |                        |                        |        | 2.70      | 2.36      | 1.50      |        |        |        |
|             |            |                        |                        |        | 3.09      | 3.58      | 2.56      |        |        |        |
|             |            |                        |                        |        | 3.09      | 3.15      | 2.62      |        |        |        |
|             |            |                        |                        |        | 3.41      | 1.80      |           |        |        |        |
| <b>N</b>    | 6          | 14                     | 7                      | 12     |           | 77        |           | 22     | 12     | 8      |
| <b>Mean</b> | 1          | 1.19                   | 1.73                   | 2.48   |           | 2.63      |           | 2.81   | 2.71   | 3.23   |

Mean nuclei/fibre values for individual embryos. Means are calculated using these values as sample points, to weight each embryo equally, i.e.  $n$ =number of embryos.

**Table S5. Data for morphant embryos at 26-28 hpf**

| Morpholino: | Dock1 ATG |        |      | Dock1 splice |        | Dock5 splice 1 |        |        | Dock5 splice 2 |        |      | D1spl & D5spl1 |                |              |
|-------------|-----------|--------|------|--------------|--------|----------------|--------|--------|----------------|--------|------|----------------|----------------|--------------|
|             | Dose:     | 0.5 mM | 1 mM | 1.5 mM       | 0.3 mM | 0.5 mM         | 0.3 mM | 0.4 mM | 0.5 mM         | 0.5 mM | 1 mM | 2 mM           | 0.225 & 0.3 mM | 0.3 & 0.4 mM |
|             |           | 2.76   | 2.03 | 1.79         | 1.40   | 1.10           | 1.19   | 1.42   | 1.16           | 1.58   | 1.14 | 1.14           | 1.38           | 1.02         |
|             |           | 2.78   | 2.14 | 2.49         | 1.64   | 1.33           | 1.71   | 1.50   | 1.26           | 1.23   | 1.50 | 1.33           | 2.12           | 1.10         |
|             |           | 2.34   | 1.72 | 2.15         | 1.45   | 1.51           | 2.14   | 1.23   | 1.07           | 2.06   | 2.15 | 2.10           | 1.93           | 1.22         |
|             |           | 2.21   | 1.43 | 2.55         | 1.08   | 1.17           | 1.62   | 1.00   | 1.09           | 2.28   | 1.14 | 2.00           | 1.24           | 1.89         |
|             |           | 2.20   | 1.69 | 2.51         | 1.59   | 1.13           | 1.36   | 1.15   | 1.60           | 2.00   | 1.78 | 1.33           | 2.18           | 1.68         |
|             |           |        | 2.05 | 2.76         | 1.35   | 1.62           | 1.59   | 1.26   | 1.18           | 1.72   | 1.87 | 1.50           | 1.55           | 1.00         |
|             |           |        | 2.15 | 2.09         | 2.50   |                | 1.31   | 1.04   | 1.26           | 1.83   | 1.86 |                | 1.74           |              |
|             |           |        | 1.78 | 2.23         | 1.63   |                | 1.88   | 1.22   | 1.04           | 1.71   | 2.32 |                | 1.31           |              |
|             |           |        | 2.17 | 3.00         | 1.50   |                | 1.67   | 1.07   | 1.07           | 2.13   | 1.03 |                |                |              |
|             |           |        | 3.00 | 2.32         | 2.00   |                | 2.33   | 1.00   | 2.64           | 2.00   | 1.26 |                |                |              |
|             |           |        | 1.29 | 1.59         | 1.56   |                | 1.50   | 1.76   | 2.53           | 1.93   | 3.06 |                |                |              |
|             |           |        | 1.26 | 2.47         | 1.67   |                |        |        | 1.43           | 2.33   | 2.42 |                |                |              |
|             |           |        |      | 2.41         | 1.73   |                |        |        | 1.62           | 1.67   | 1.92 |                |                |              |
|             |           |        |      | 2.65         | 2.04   |                |        |        | 1.00           | 1.52   |      |                |                |              |
|             |           |        |      | 2.12         | 1.91   |                |        |        | 1.62           | 1.81   |      |                |                |              |
|             |           |        |      | 2.39         | 1.93   |                |        |        | 1.26           | 2.10   |      |                |                |              |
|             |           |        |      |              | 2.01   |                |        |        | 1.46           | 1.54   |      |                |                |              |
|             |           |        |      |              | 2.00   |                |        |        | 1.11           | 1.85   |      |                |                |              |
|             |           |        |      |              | 1.77   |                |        |        | 1.11           | 2.55   |      |                |                |              |
|             |           |        |      |              |        |                |        |        | 1.19           | 1.69   |      |                |                |              |
|             |           |        |      |              |        |                |        |        | 1.19           |        |      |                |                |              |
|             |           |        |      |              |        |                |        |        | 1.17           |        |      |                |                |              |
|             |           |        |      |              |        |                |        |        | 1.54           |        |      |                |                |              |
|             |           |        |      |              |        |                |        |        | 1.25           |        |      |                |                |              |
|             |           |        |      |              |        |                |        |        | 1.26           |        |      |                |                |              |
| N           |           | 5      | 12   | 16           | 19     | 6              | 11     | 11     | 25             | 20     | 13   | 6              | 8              | 6            |
| Mean        |           | 2.46   | 1.89 | 2.35         | 1.72   | 1.31           | 1.66   | 1.24   | 1.36           | 1.88   | 1.80 | 1.57           | 1.68           | 1.32         |

  

| Morpholino: | Crk ATG | Crk splice |        | Crk-like ATG |        |        | Crk-like splice |        | D5spl1 & CrklATG |              | Crk spl & CrklATG |              |
|-------------|---------|------------|--------|--------------|--------|--------|-----------------|--------|------------------|--------------|-------------------|--------------|
|             | Dose:   | 0.1 mM     | 0.5 mM | 1 mM         | 0.3 mM | 0.4 mM | 0.5 mM          | 0.5 mM | 2 mM             | 0.3 & 0.3 mM | 0.4 & 0.4 mM      | 0.5 & 0.4 mM |
|             |         | 1.56       | 1.74   | 1.49         | 2.46   | 1.50   | 1.17            | 2.78   | 1.38             | 1.27         | 1.32              | 1.61         |
|             |         | 1.47       | 1.54   | 1.79         | 1.97   | 2.00   | 1.07            | 2.53   | 2.00             | 2.54         | 1.09              | 1.15         |
|             |         | 1.47       | 1.88   | 1.31         | 1.58   | 1.87   | 1.26            | 1.96   | 1.13             | 2.08         | 1.15              | 1.24         |
|             |         | 1.31       | 1.48   | 1.17         | 2.33   | 1.70   | 1.29            | 3.67   | 1.85             | 2.19         | 1.04              | 1.34         |
|             |         | 2.42       | 1.76   | 1.27         | 1.41   | 1.41   | 1.65            | 3.33   | 1.74             | 1.25         | 1.50              | 1.74         |
|             |         | 1.37       |        | 1.54         | 1.57   | 2.58   | 1.22            | 2.92   | 2.26             | 1.07         | 1.12              | 1.22         |
|             |         | 1.71       |        | 1.19         | 1.40   | 1.69   | 1.96            | 2.26   | 2.05             | 1.41         | 1.04              | 1.44         |
|             |         | 1.18       |        | 1.58         | 1.67   | 1.76   | 1.55            | 3.33   | 1.47             | 1.04         | 1.07              | 2.19         |
|             |         |            |        | 1.76         | 1.44   | 1.23   | 1.41            | 1.83   | 2.18             | 1.02         | 1.02              |              |
|             |         |            |        | 1.59         | 1.57   | 1.80   | 1.86            | 2.00   | 1.42             | 1.00         | 1.35              |              |
|             |         |            |        | 1.37         | 1.54   | 1.67   | 1.11            | 2.88   | 1.30             | 1.00         | 1.15              |              |
|             |         |            |        | 1.79         | 1.56   | 2.04   | 1.58            | 2.00   | 2.10             | 1.00         |                   |              |
|             |         |            |        | 2.25         | 1.06   | 1.64   | 1.93            | 1.96   | 1.69             | 1.11         |                   |              |
|             |         |            |        | 1.65         |        | 1.17   | 1.83            | 2.21   | 1.45             |              |                   |              |
|             |         |            |        | 1.83         |        | 2.00   | 1.51            | 2.65   | 1.69             |              |                   |              |
|             |         |            |        | 1.52         |        | 1.54   | 1.83            |        | 2.13             |              |                   |              |
|             |         |            |        |              |        | 1.59   | 1.35            |        | 1.44             |              |                   |              |
|             |         |            |        |              |        | 1.67   | 1.34            |        | 1.21             |              |                   |              |
|             |         |            |        |              |        | 2.30   | 1.40            |        | 1.10             |              |                   |              |
|             |         |            |        |              |        |        |                 |        | 1.29             |              |                   |              |
|             |         |            |        |              |        |        |                 |        | 2.24             |              |                   |              |
|             |         |            |        |              |        |        |                 |        | 2.67             |              |                   |              |
|             |         |            |        |              |        |        |                 |        | 2.27             |              |                   |              |
|             |         |            |        |              |        |        |                 |        | 1.65             |              |                   |              |
|             |         |            |        |              |        |        |                 |        | 2.69             |              |                   |              |
|             |         |            |        |              |        |        |                 |        | 1.46             |              |                   |              |
|             |         |            |        |              |        |        |                 |        | 1.50             |              |                   |              |
|             |         |            |        |              |        |        |                 |        | 1.73             |              |                   |              |
|             |         |            |        |              |        |        |                 |        | 1.82             |              |                   |              |
|             |         |            |        |              |        |        |                 |        | 2.05             |              |                   |              |
| N           |         | 8          | 5      | 16           | 13     | 19     | 19              | 15     | 30               | 13           | 11                | 8            |
| Mean        |         | 1.56       | 1.68   | 1.57         | 1.66   | 1.74   | 1.49            | 2.55   | 1.77             | 1.38         | 1.17              | 1.49         |

Mean nuclei/fibre values for individual embryos. Means are calculated using these values as sample points, to weight each embryo equally, i.e.  $n$ =number of embryos.

**Table S6. Data for embryos injected with *crk* and *crkl* mRNA, at 26-28 hpf**

|             | Control | <i>crk</i> mRNA<br>0.3 µg/µl | Crk splice MO<br>1 mM | <i>crk</i> mRNA<br>0.3 µg/µl &<br>Crk spl MO<br>1 mM | <i>crkl</i> mRNA<br>0.1 µg/µl | Crkl splice MO<br>1.5 mM | Crkl mRNA<br>0.3 µg/µl &<br>Crkl spl MO<br>1.5 mM |      |
|-------------|---------|------------------------------|-----------------------|------------------------------------------------------|-------------------------------|--------------------------|---------------------------------------------------|------|
|             | 2.72    | 2.71                         | 3.09                  | 1.87                                                 | 2.54                          | 3.64                     | 1.13                                              | 3.96 |
|             | 2.95    | 2.55                         | 3.15                  | 2.76                                                 | 2.32                          | 4.13                     | 1.85                                              | 2.74 |
|             | 2.20    | 2.34                         | 2.46                  | 2.18                                                 | 2.41                          | 4.04                     | 2.52                                              | 3.15 |
|             | 3.01    | 2.86                         | 3.60                  | 1.59                                                 | 2.91                          | 3.54                     | 1.42                                              | 3.23 |
|             | 2.81    | 2.91                         | 3.29                  | 2.30                                                 | 1.60                          | 3.39                     | 2.22                                              | 2.28 |
|             | 2.05    | 2.86                         | 2.92                  | 1.50                                                 | 2.06                          | 2.66                     | 1.66                                              | 3.14 |
|             | 2.62    | 2.22                         | 3.17                  | 1.78                                                 | 2.61                          | 2.95                     | 2.00                                              | 2.37 |
|             | 3.28    | 2.37                         | 3.36                  | 2.04                                                 | 2.58                          | 3.72                     | 2.50                                              | 4.21 |
|             | 1.73    | 2.48                         | 3.10                  | 1.40                                                 | 2.58                          | 3.29                     | 2.04                                              | 3.23 |
|             | 2.50    | 2.42                         | 2.58                  | 1.37                                                 | 1.60                          | 2.39                     | 1.16                                              | 2.40 |
|             | 2.19    | 2.64                         | 3.04                  | 1.72                                                 | 1.62                          | 3.27                     | 1.58                                              | 2.27 |
|             | 1.86    | 2.80                         | 2.80                  | 1.59                                                 | 1.53                          | 3.71                     | 2.18                                              | 1.61 |
|             | 2.22    | 2.52                         | 2.30                  | 1.82                                                 | 1.78                          | 3.10                     | 1.36                                              | 3.22 |
|             | 3.24    | 2.53                         | 2.74                  | 1.43                                                 | 2.10                          | 3.26                     | 1.33                                              | 3.20 |
|             | 2.71    |                              | 3.05                  | 1.52                                                 | 1.21                          | 4.20                     | 2.17                                              |      |
|             |         |                              | 3.30                  | 1.59                                                 | 2.00                          |                          | 1.47                                              |      |
|             |         |                              | 1.16                  | 2.31                                                 |                               | 1.45                     |                                                   |      |
|             |         |                              | 1.88                  |                                                      |                               |                          |                                                   |      |
| <b>N</b>    | 29      | 16                           | 18                    | 17                                                   | 15                            | 17                       | 14                                                |      |
| <b>Mean</b> | 2.56    | 3.00                         | 1.75                  | 2.10                                                 | 3.42                          | 1.77                     | 2.93                                              |      |

Control group injected with *mylz2:GFP* alone. Mean nuclei/fibre values for individual embryos. Means are calculated using these values as sample points, to weight each embryo equally, i.e.  $n$ =number of embryos.
